# Supplementary material for: Effect of crystal size on the acidity of nanometric Y zeolite: number of sites, strength, acid nature, and dehydration of 2-propanol
Source: Royal Society of Chemistry journal article supplement (doi:10.1039/d2nj01530g), 2022-01-01
Supplement: d2nj01530g1.pdf [file d2nj01530g1.pdf]

Supplementary information

**Effect of crystal size on the acidity of nanometric Y zeolite: number of sites, strength, acid nature, and dehydration of 2-propanol**

**C. J. Mendoza Merlano<sup>a\*</sup>, T. A. Zepeda<sup>b</sup>, G. Alonso-Núñez<sup>b</sup>, J Noe Diaz de Leon<sup>b</sup>, C. Manrique<sup>a</sup>, A. Echavarría Isaza<sup>a</sup>**

<sup>a</sup>Universidad de Antioquia, Grupo Catalizadores y Adsorbentes, Calle 70 No. 52-21 Medellín, Colombia.

<sup>b</sup>Universidad Nacional Autónoma de México, Centro de Nanociencias y Nanotecnología(CNyN), Km. 107 Carretera Tijuana- Ensenada Col. Pedregal Playitas, C.P. 22860, Ensenada, Baja California, México.

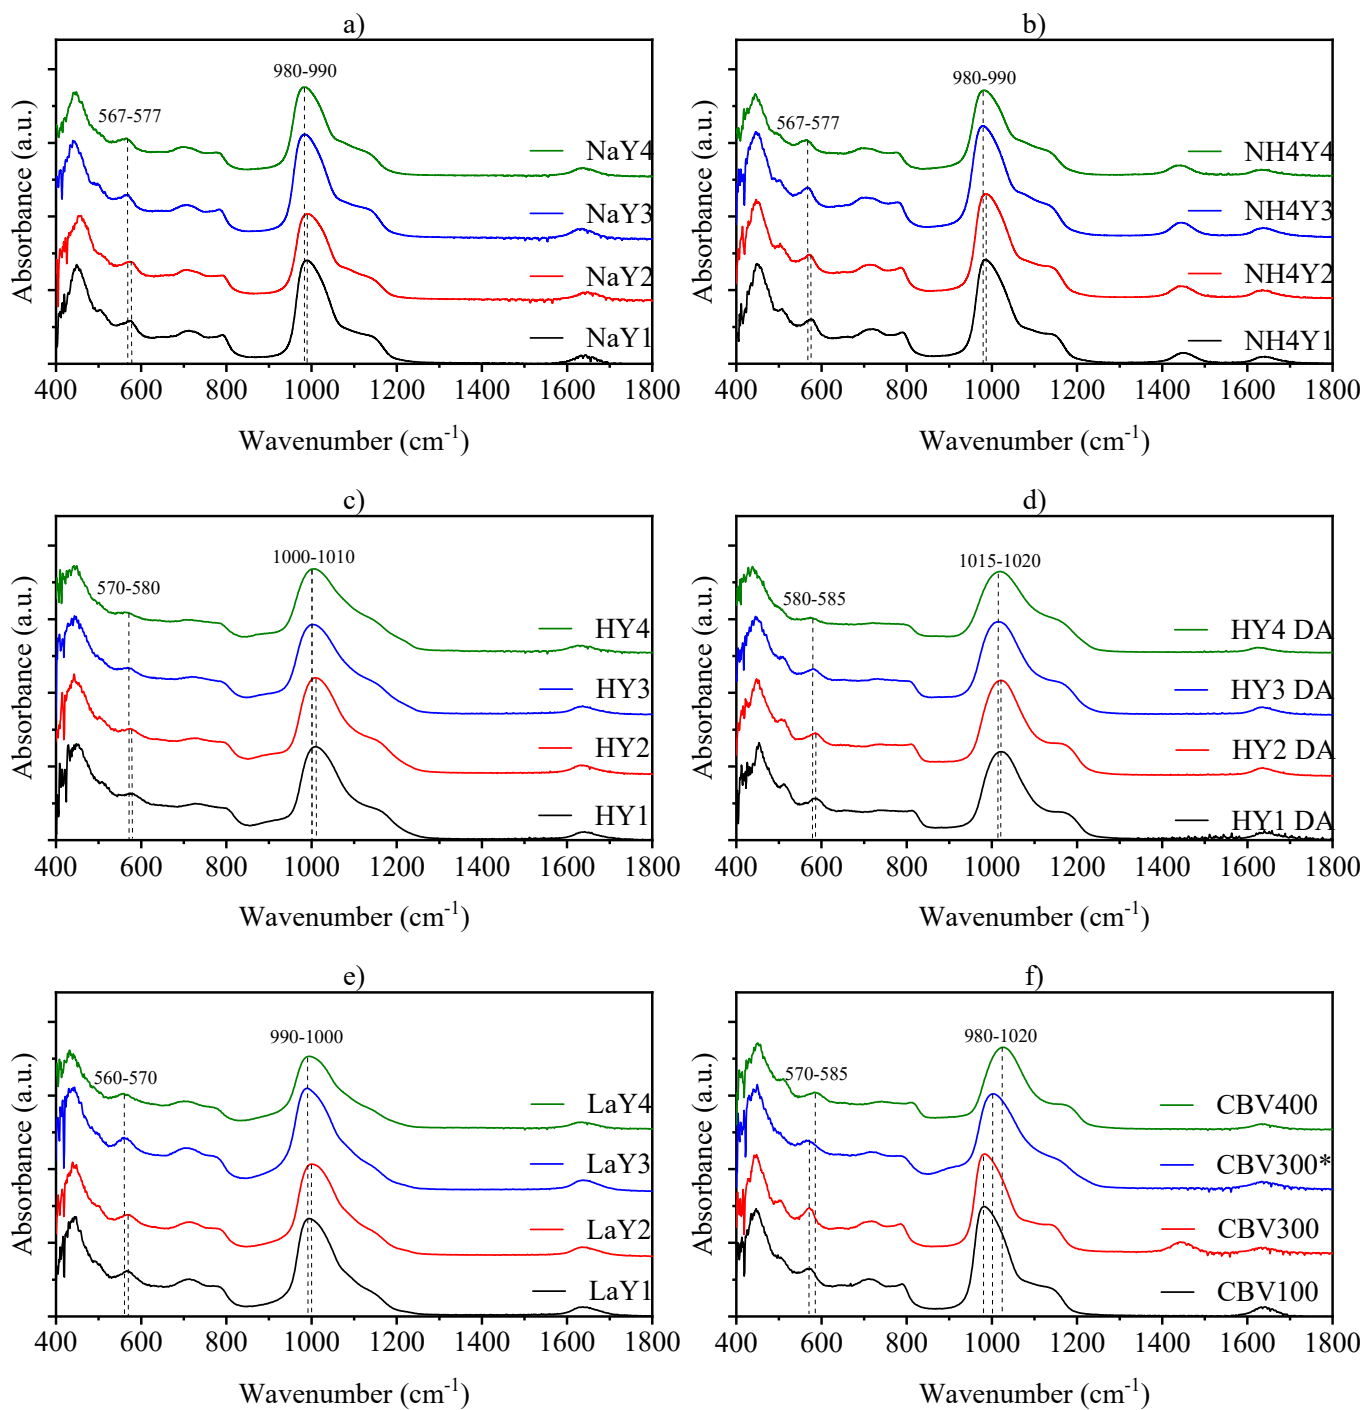

Fig. 15. FT-IR spectra of a) NaY, b) NH4Y, c) HY, d) HY DA, e) LaY and f) Commercial zeolites. CBV300\*: calcination.

a)  
Survey

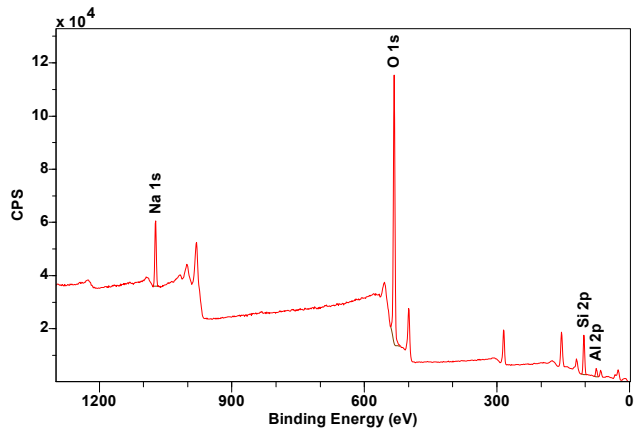

b)  
Survey

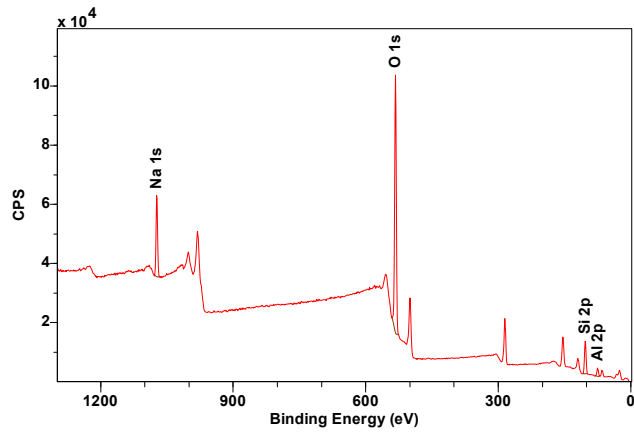

c)  
Survey

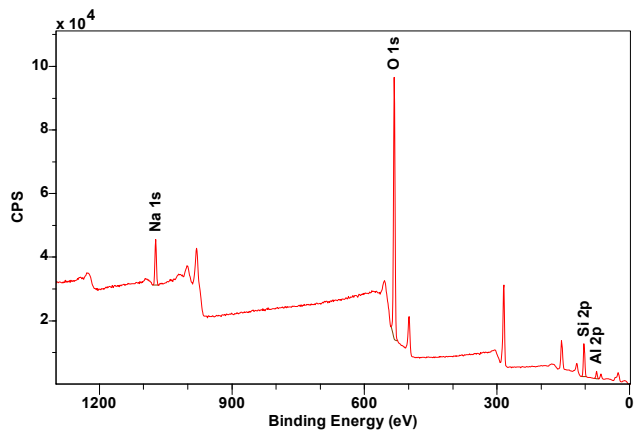

d)  
Survey

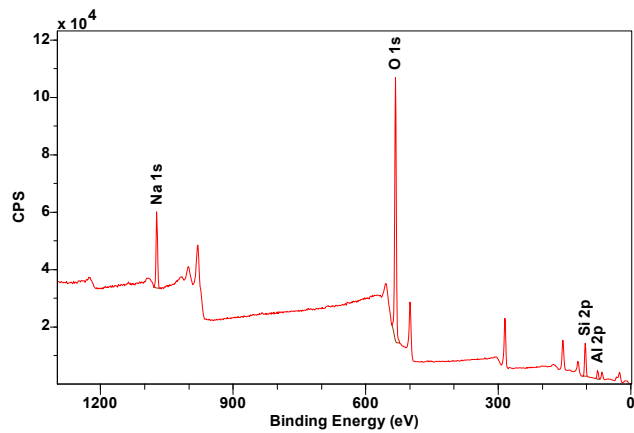

e)

Survey

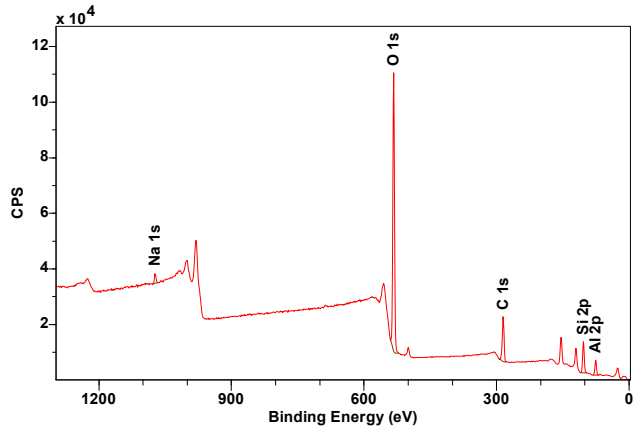

f)

Survey

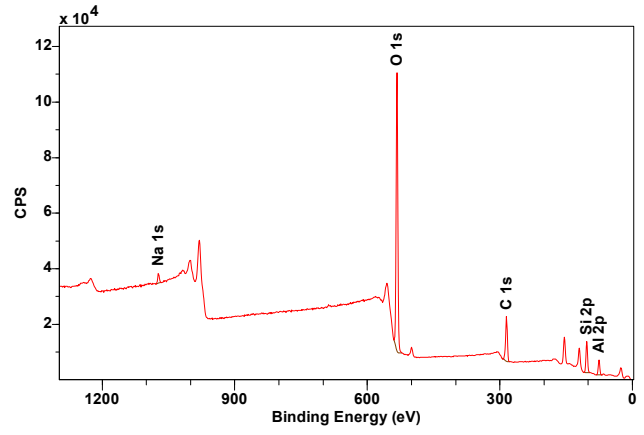

g)

Survey

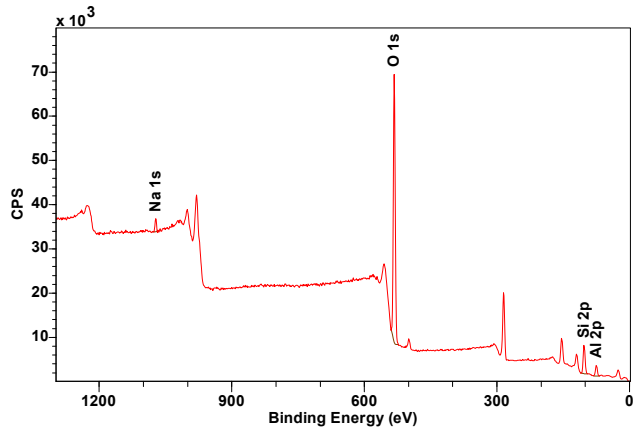

h)

Survey

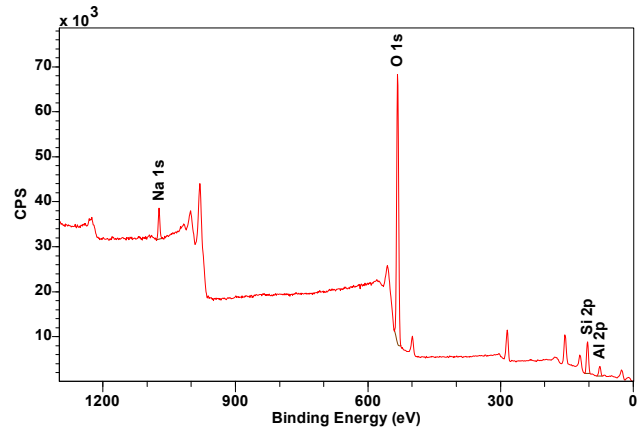

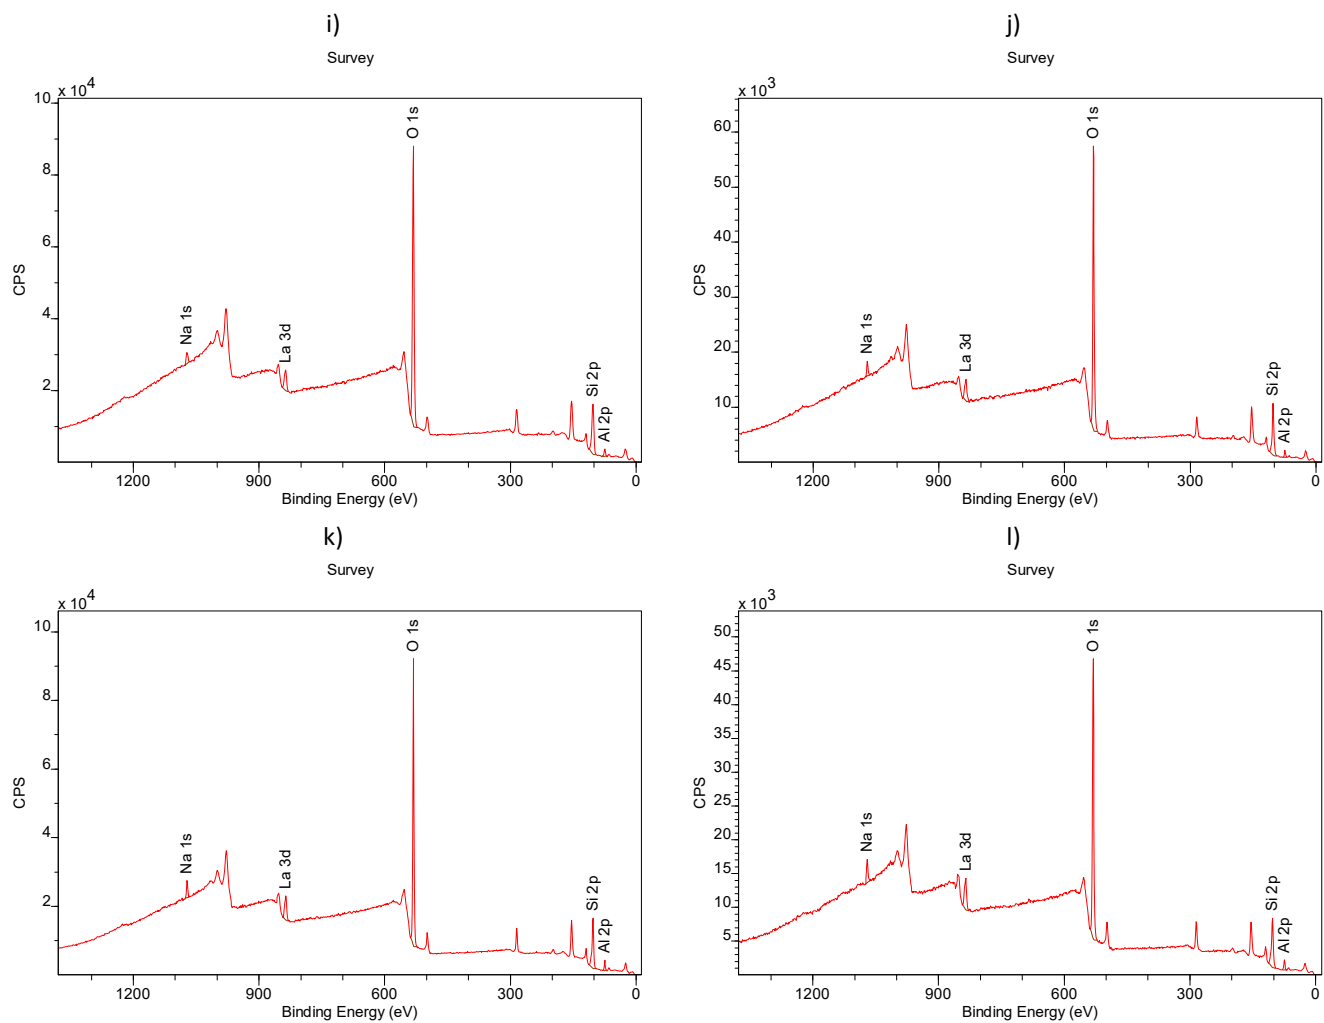

Fig. 2S. XPS spectra of a) NaY1, b) NaY2, c) NaY3, d) NaY4, e) HY1 DA, f) HY2 DA, g) HY3 DA and h) HY4 DA, i) LaY1, j) LaY2, k) LaY3 and l) LaY4

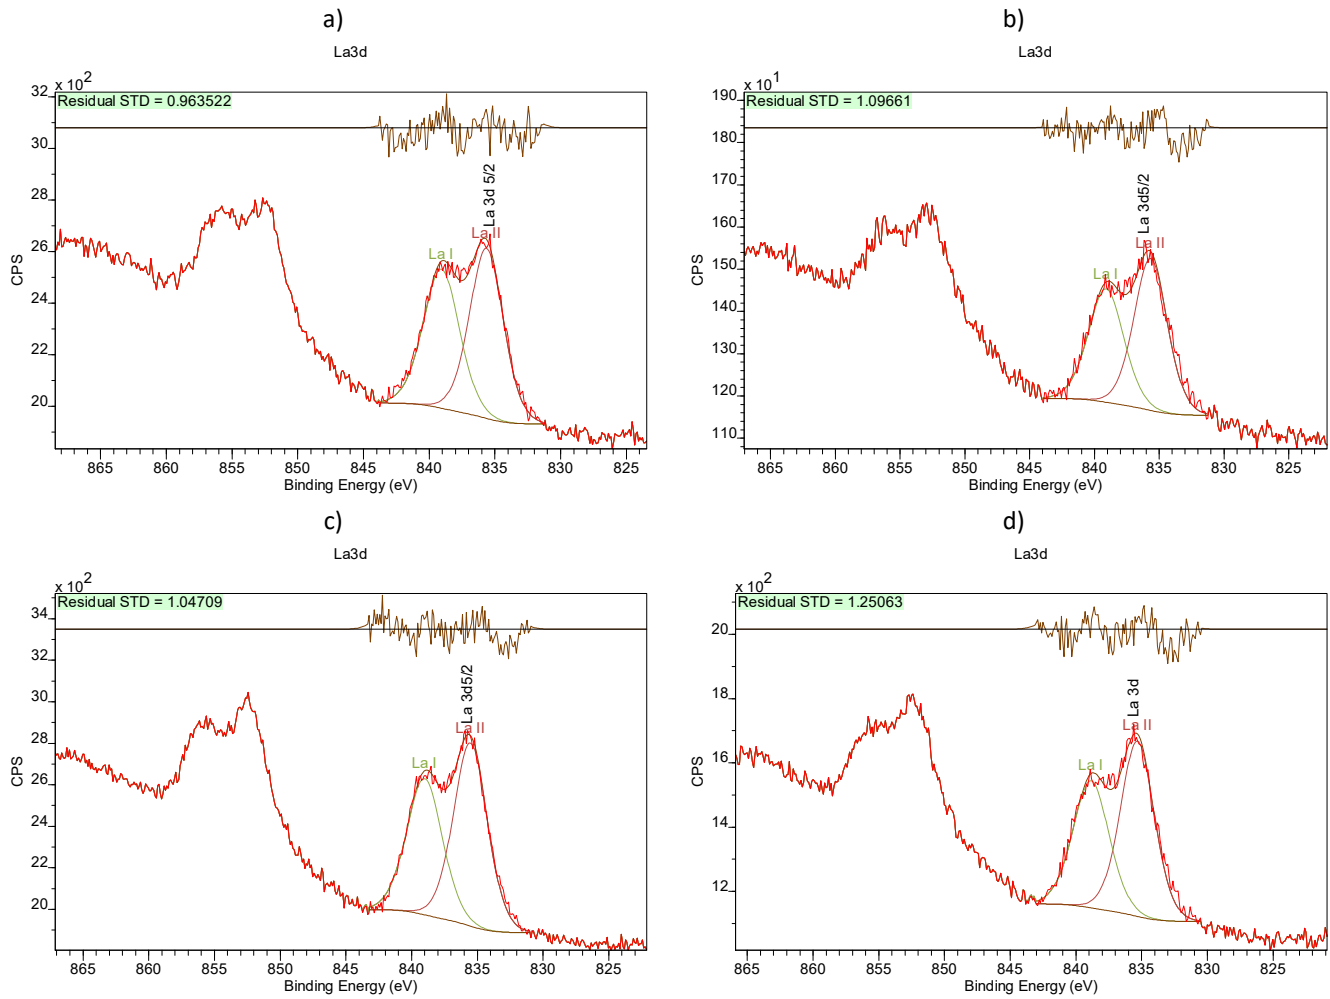

Fig. 3S. XPS spectra 3d5/2 deconvolution of a) LaY1, b) LaY2, c) LaY3 and d) LaY4

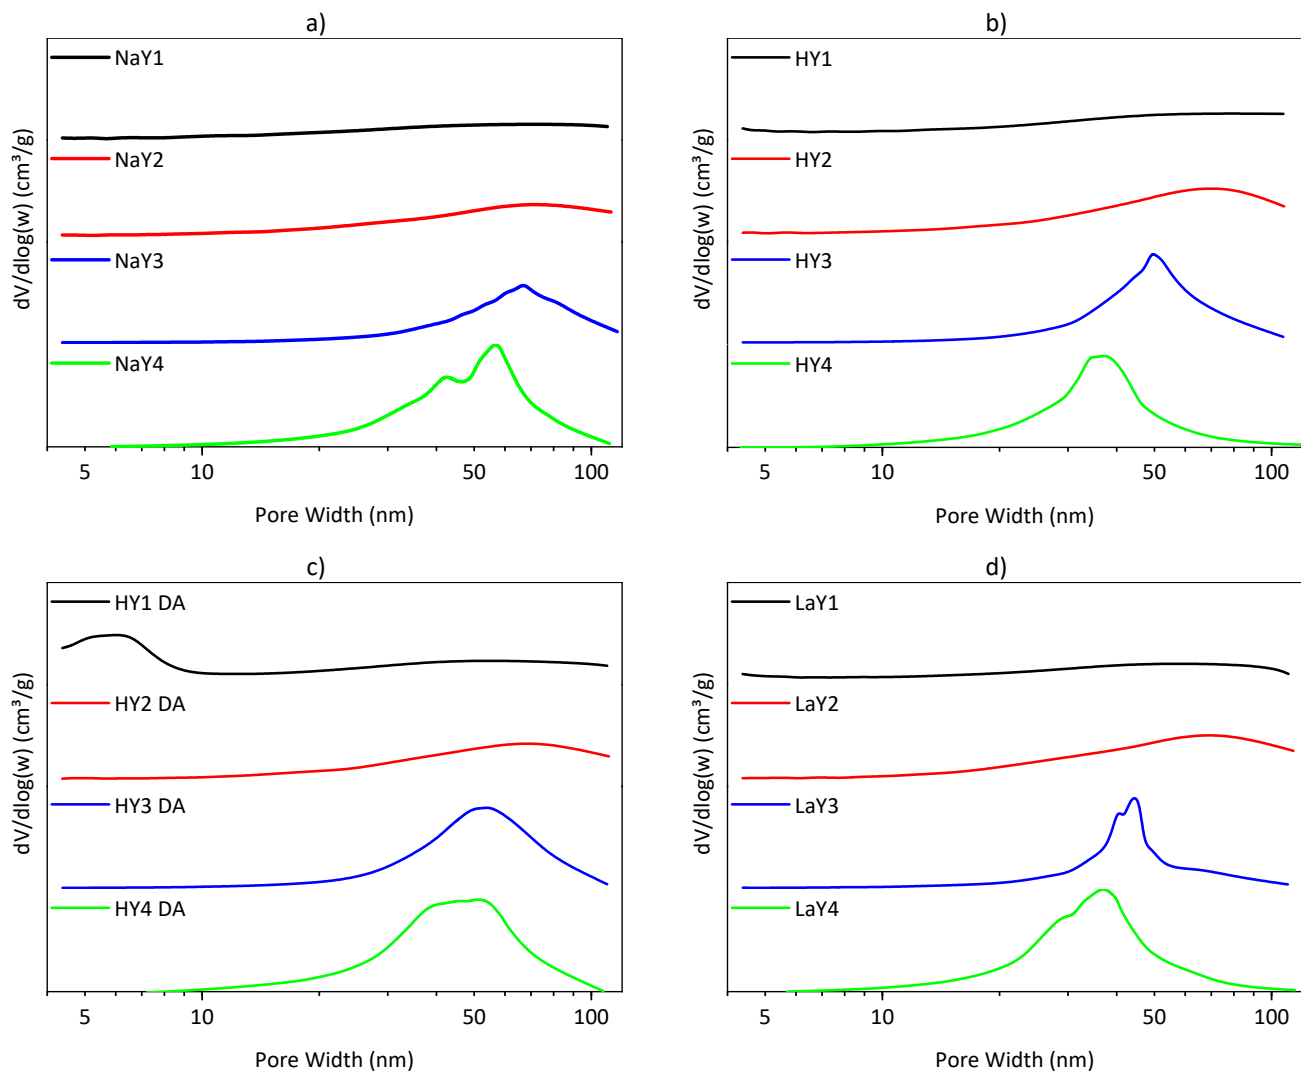

Fig. 4S. Pore size distribution of a) NaY, b) HY, c) HY DA and d) LaY

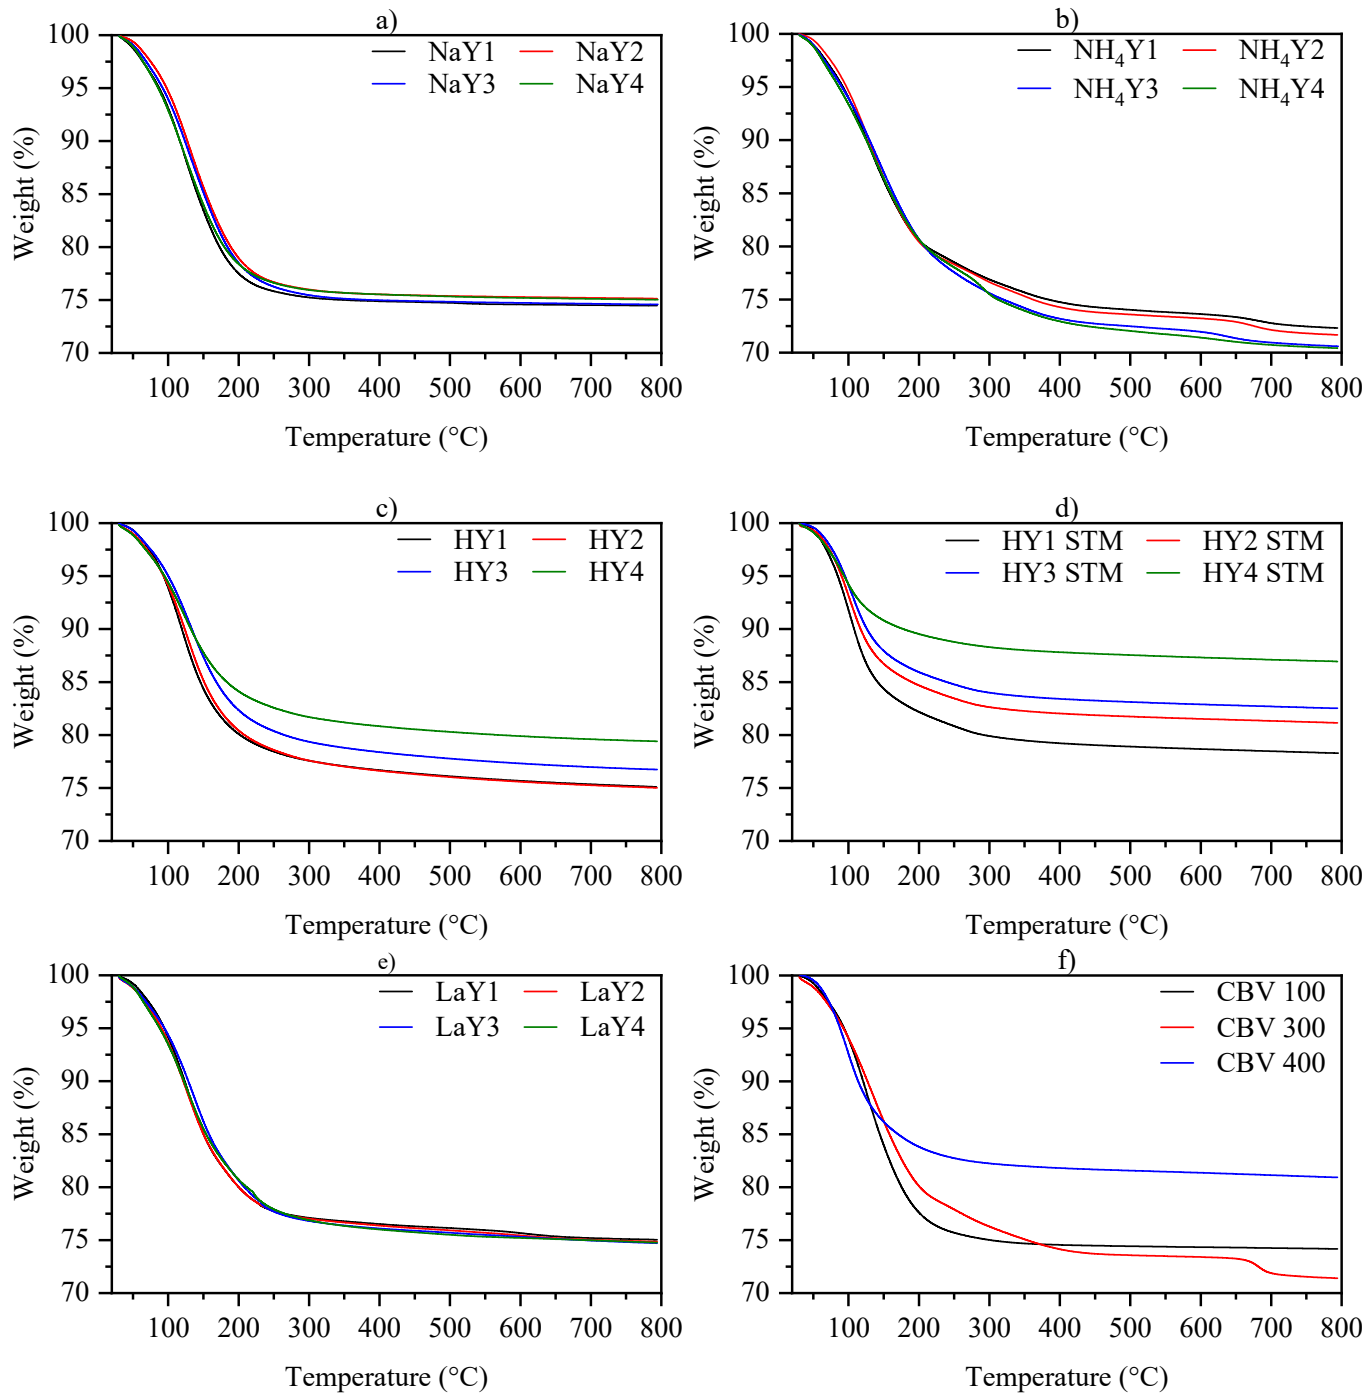

Fig. 5S. Thermograms of a) NaY, b) NH<sub>4</sub>Y, c) HY, d) HY DA, e) LaY and f) commercial zeolites



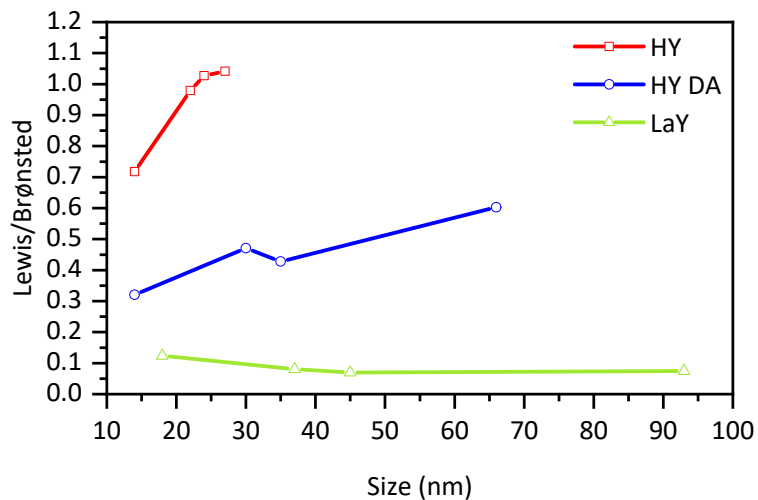

Fig. 6S. Lewis/Bronsted vs crystallite size of acid zeolites

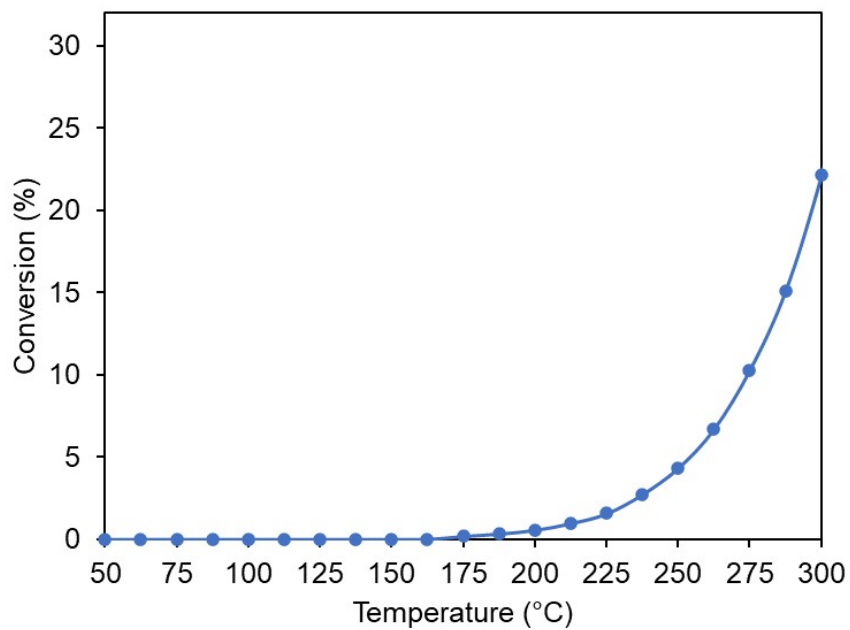

Fig. 7S. Thermal decomposition of 2-propanol.
